# Supplementary material for: Decay Rate of Escherichia coli in a Mountainous Tropical Headwater Wetland
Source: MDPI journal article supplement (doi:10.3390/w13152068), 2021-07-29
Supplement: s1 [file s1]

Archive with 1 entries (1 files):
- water-1246140-supplementary.pdf
